# Supplementary material for: An ultrasound-assisted approach to synthesize Mn3O4/RGO hybrids with high capability for lithium ion batteries
Source: Royal Society of Chemistry journal article supplement (doi:10.1039/c4dt01695e), 2014-08-27
Supplement: c4dt01695e1.pdf [file c4dt01695e1.pdf]

## Supporting Information

### **Ultrasound-Assisted Approach to Synthesize $\text{Mn}_3\text{O}_4/\text{RGO}$ Hybrids with High Capability for Lithium Ion Batteries**

**Yunqing Luo,\* Shanshan Fan, Nongyi Hao, Shuangling Zhong and Wencong Liu\***

College of Resources and Environment, Jilin Agricultural University, Changchun, 130118, P. R China

E-mail: [qyluo2014@163.com](mailto:qyluo2014@163.com); [chemliuwc@163.com](mailto:chemliuwc@163.com)

## Experimental Section:

### *Synthesis of GO:*

GO was synthesized from natural graphite powder according to a modified Hummers method.<sup>25</sup> Briefly, 0.9 g of graphite powder was added into a mixture of 7.2 mL of 98% H<sub>2</sub>SO<sub>4</sub>, 1.5 g of K<sub>2</sub>S<sub>2</sub>O<sub>8</sub>, and 1.5 g of P<sub>2</sub>O<sub>5</sub>. The solution was kept at 80 °C for 4.5 h, followed by thorough washing with water. Thereafter, the as-treated graphite was put into a 250 mL beaker, to which 0.5 g of NaNO<sub>3</sub> and 23 mL of H<sub>2</sub>SO<sub>4</sub> (98%) were then added while keeping the beaker in the ice bath. Subsequently, 3 g of KMnO<sub>4</sub> was added slowly. After 5 min, the ice bath was removed and the solution was heated up to and kept at 35 °C under vigorous stirring for 2 h, followed by the slow addition of 46 mL of water. Finally, 40 mL of water and 5 mL of H<sub>2</sub>O<sub>2</sub> was added, followed by water washing and filtration. The exfoliation of graphene oxide was then dispersed in ethylene glycol (5 mg mL<sup>-1</sup>) under ultrasonication for 2 h to yield a homogeneous suspension.

### *Synthesis of Mn<sub>3</sub>O<sub>4</sub>/RGO hybrids:*

1 mmol Mn(OAc)<sub>2</sub> was dissolved in 10 ml water. Then 3 ml GO solution was dropped in followed by added 200 ul *Tert*-butylamine. After ultrasound treatment for 5 minutes, the products were purified by centrifugation and washed with water for three times.

### *Synthesis of H-Mn<sub>3</sub>O<sub>4</sub>/RGO hybrids:*

The as-obtained Mn<sub>3</sub>O<sub>4</sub>/RGO was further hydrothermal treated in water at 180 °C for 12 h.

### *Characterization:*

The X-ray diffraction patterns of the products were collected on a Rigaku-D/max 2500 V X-ray diffractometer with Cu-K<sub>α</sub> radiation ( $\lambda = 1.5418 \text{ \AA}$ ), with an operation voltage and current maintained at 40 kV and 40 mA. Transmission electron microscopic (TEM) images were obtained with a TECNAI G2 high-resolution transmission electron microscope operating at 200 kV. XPS measurement was performed on an ESCALAB-MKII 250 photoelectron spectrometer (VG Co.) with Al K<sub>α</sub> X-ray radiation as the X-ray source for excitation.

### *Electrochemical measurements:*

The test cell consisted of a working electrode and a lithium foil which were separated by a Celgard 2400 membrane. The electrolyte solution was prepared by dissolving 1 M LiPF<sub>6</sub> in EC-DMC (1 : 1 w/w). The working electrodes were prepared by casting slurry containing 80 % active material, 10 % acetylene black and 10 % polyvinylidene fluoride (PVDF) onto a copper foil. After vacuum drying at 80 °C for about 24 h, the electrode disks were punched and weighed. Each electrode has approximately 1–3 mg of active material. Galvanostatic charge–discharge cycling tests were performed using a LAND CT2001A multi-channel battery testing system in the voltage range between 0.01 and 3 V at room temperature.

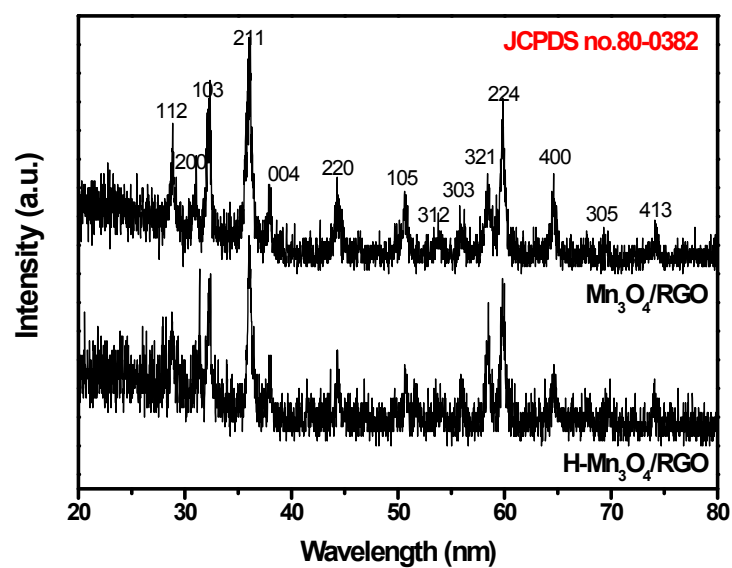

**Fig. S1.** XRD patterns of the  $\text{Mn}_3\text{O}_4/\text{RGO}$  and  $\text{H-Mn}_3\text{O}_4/\text{RGO}$  hybrids. All the peaks correspond well with those of  $\text{Mn}_3\text{O}_4$  with a tetragonal spinel structure (space group  $I4_1/amd$ , JCPDS no.80-0382).

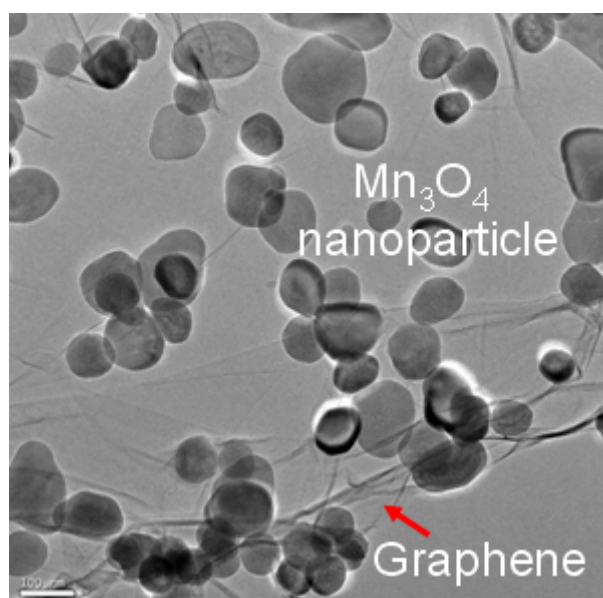

Fig. S2. TEM image of H- $\text{Mn}_3\text{O}_4$ /RGO

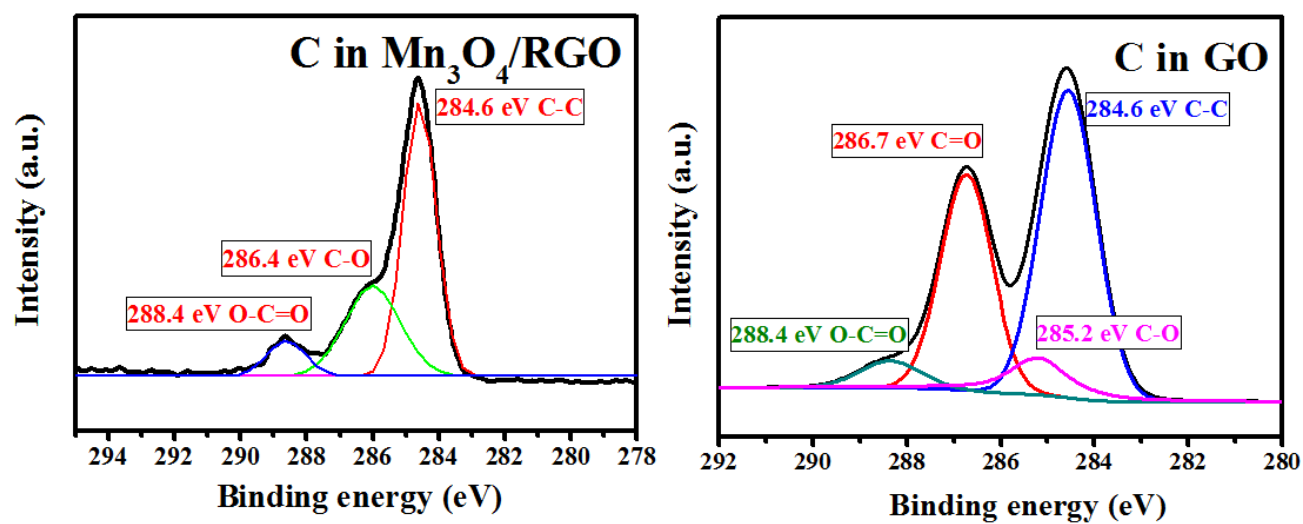

Fig. S3. The XPS spectra of C in Mn<sub>3</sub>O<sub>4</sub>/RGO and GO nanosheets.

**Table S1. Typical Mn<sub>3</sub>O<sub>4</sub> based anode materials for LIB applications**

|                                                               | Special particle shapes | Content of Mn <sub>3</sub> O <sub>4</sub> (wt %) | Specific capacity at low current density                           | Specific capacity at high current density                           | Reference |
|---------------------------------------------------------------|-------------------------|--------------------------------------------------|--------------------------------------------------------------------|---------------------------------------------------------------------|-----------|
| <b>Bare Mn<sub>3</sub>O<sub>4</sub></b>                       | sponge like powder      | 100                                              | 800 mA h g <sup>-1</sup> after 40 cycles at 0.25 C                 |                                                                     | 16        |
| <b>Mn<sub>3</sub>O<sub>4</sub>/graphene</b>                   | nanoparticles           | 90                                               | 810 mA h g <sup>-1</sup> after 40 cycles at 40 mA g <sup>-1</sup>  | 351 mA h g <sup>-1</sup> after 10 cycles at 1600 mA g <sup>-1</sup> | 9         |
| <b>Mn<sub>3</sub>O<sub>4</sub>/graphene</b>                   | nanoparticles           | 81.2                                             | 900 mA h g <sup>-1</sup> after 40 cycles at 50 mA g <sup>-1</sup>  | 200 mA h g <sup>-1</sup> after 10 cycles at 2000 mA g <sup>-1</sup> | 15        |
| <b>Mn<sub>3</sub>O<sub>4</sub>/graphene</b>                   | needles                 | 62.3                                             | 675 mA h g <sup>-1</sup> after 100 cycles at 75 mA g <sup>-1</sup> |                                                                     | 17        |
| <b>Mn<sub>3</sub>O<sub>4</sub>@carbon</b>                     | nanorods                | 98.8                                             | 473 mA h g <sup>-1</sup> after 50 cycles at 40 mA g <sup>-1</sup>  |                                                                     | 18        |
| <b>Mn<sub>3</sub>O<sub>4</sub>/ordered mesoporous carbons</b> | nanoparticles           | 20                                               | 802 mA h g <sup>-1</sup> after 50 cycles at 100 mA g <sup>-1</sup> |                                                                     | 19        |
| <b>Mn<sub>3</sub>O<sub>4</sub>/CNT</b>                        | nanoparticles           | 42                                               | 592 mA h g <sup>-1</sup> after 50 cycles at 100 mA g <sup>-1</sup> | 387 mA h g <sup>-1</sup> after 10 cycles at 1000 mA g <sup>-1</sup> | 20        |

**Table S2. Element analysis of GO and Mn<sub>3</sub>O<sub>4</sub>/RGO according to XPS results**

|                                     | C-C (%) | C-O (%) | C=O (%) | O-C=O (%) | C/O    |
|-------------------------------------|---------|---------|---------|-----------|--------|
| GO                                  | 48.6    | 8       | 35.8    | 7.6       | 1/0.58 |
| Mn <sub>3</sub> O <sub>4</sub> /RGO | 84.7    | 9.2     | 0       | 6.1       | 1/0.21 |
